# Supplementary material
Source: PubMed Central journal article supplement (PMC3990021)
Supplement: supp_mol.113.089250_Supplementary_data_89250.pdf [file supp_mol.113.089250_Supplementary_data_89250.pdf]

**Article:** Defining the conformation of the ER complex that controls estrogen induced apoptosis in breast cancer.

**Authors:** Ifeyinwa Obiorah , Surojeet Sengupta , Ramona Curpan and V. Craig Jordan

**Affiliations:** Department of Oncology, Lombardi Comprehensive Cancer Center, Georgetown University Medical Center, Washington, DC 20057 (I.O, S.S, V.C.J)  
Institute of Chemistry, Romanian Academy, Timisoara, Romania (R.C)

**Journal:** Molecular Pharmacology

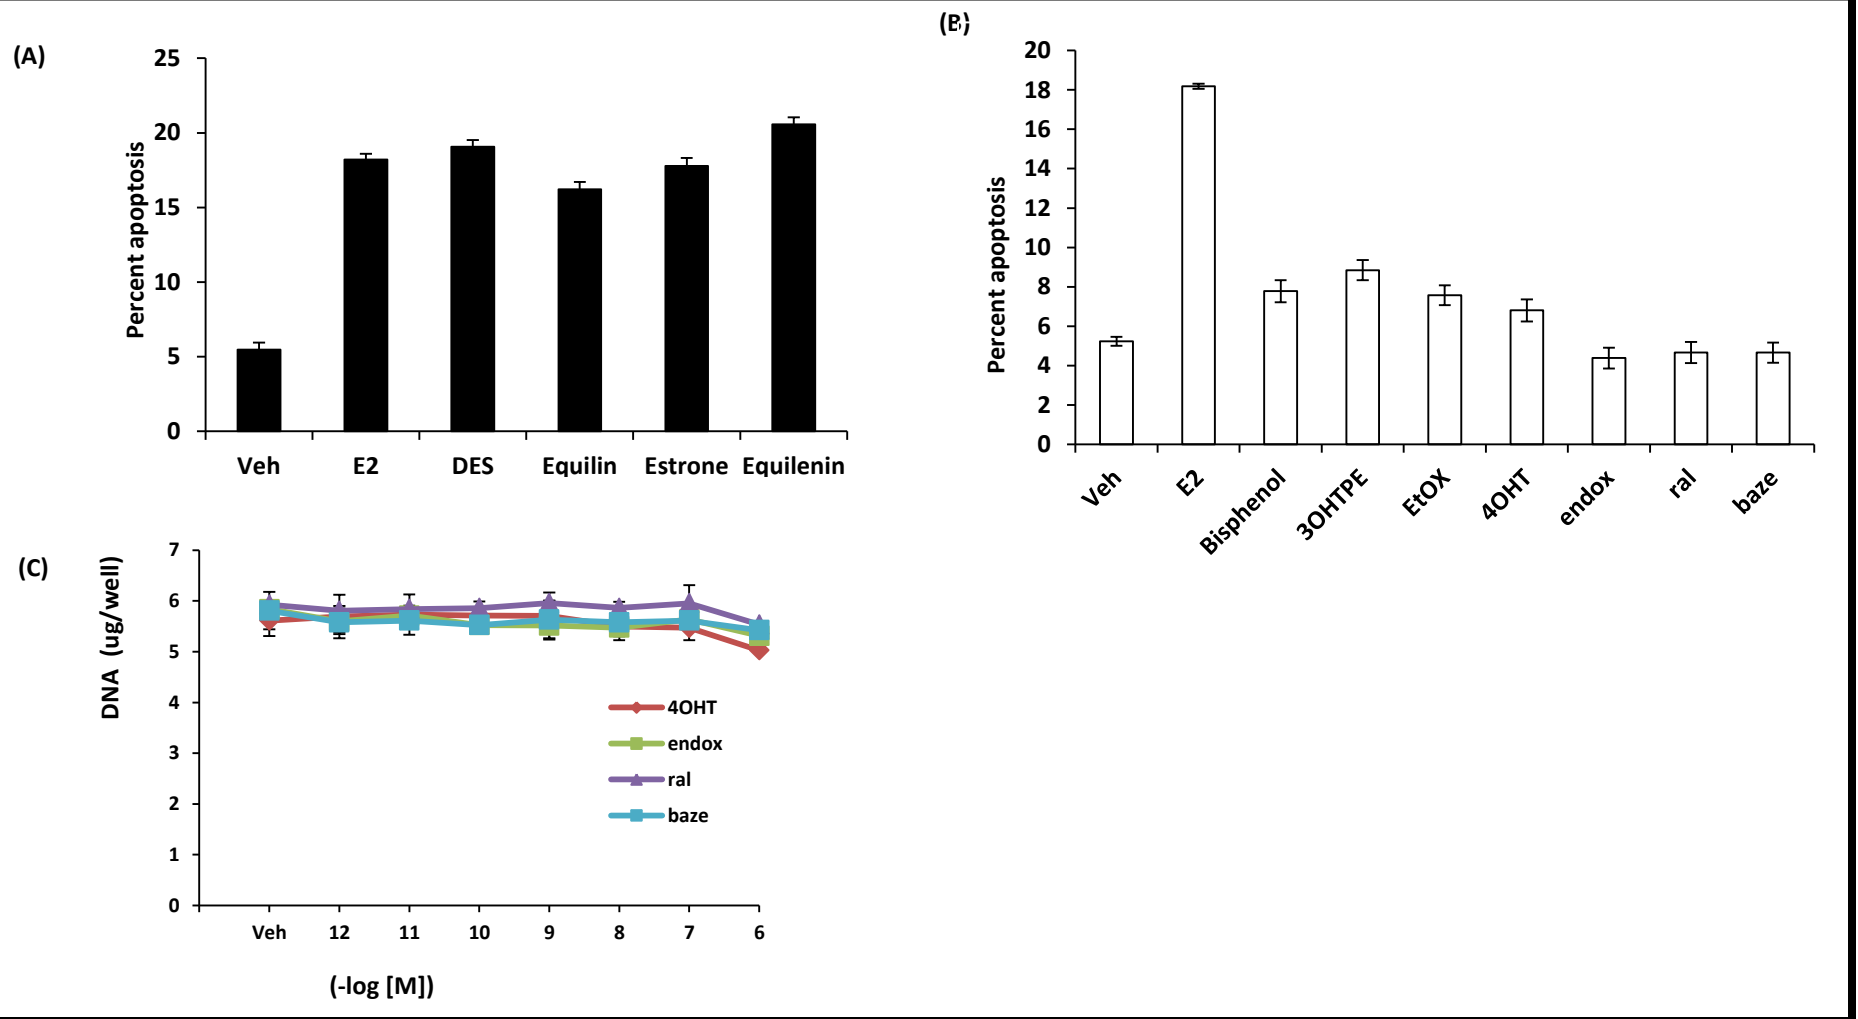

**Supplemental Figure 1. Differential effect of planar and non planar estrogens and SERMs on apoptosis.**

Annexin V staining for apoptosis . MCF7:5C cells were treated with (A) ethanol Vehicle (Veh), planar estrogens (1 nM ) (B) TPE (1 μ M ) and SERMS(1 μ M ) for 72h, and then cells were stained with FITC – annexin V and propidium iodide (PI) and analyzed by flow cytometry.(C) MCF7:5C cells treated with either Veh or 1μM SERMS for 7 days and apoptosis was quantified by measuring DNA content using a fluorescent DNA quantitation kit .

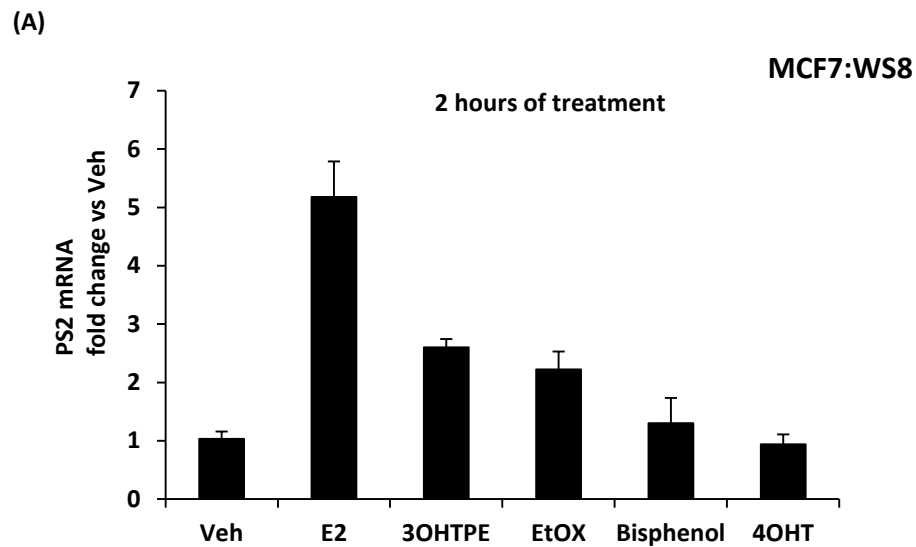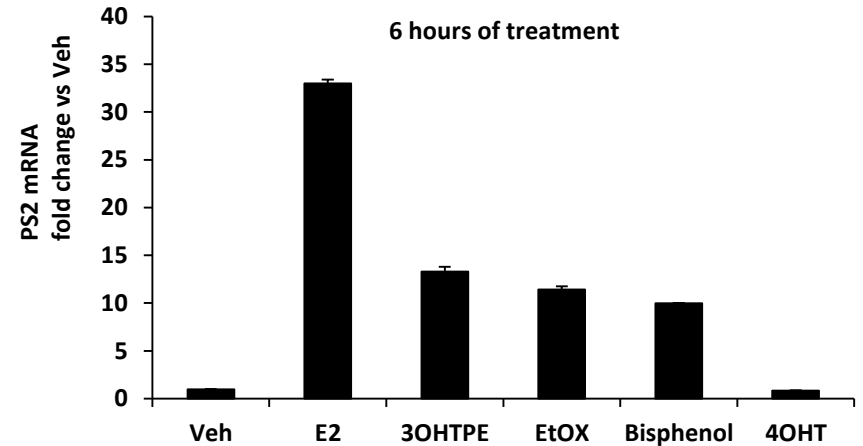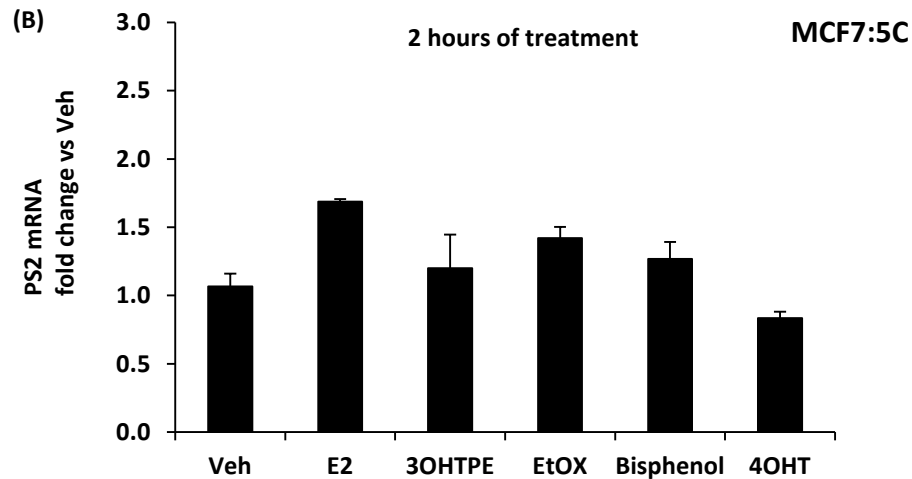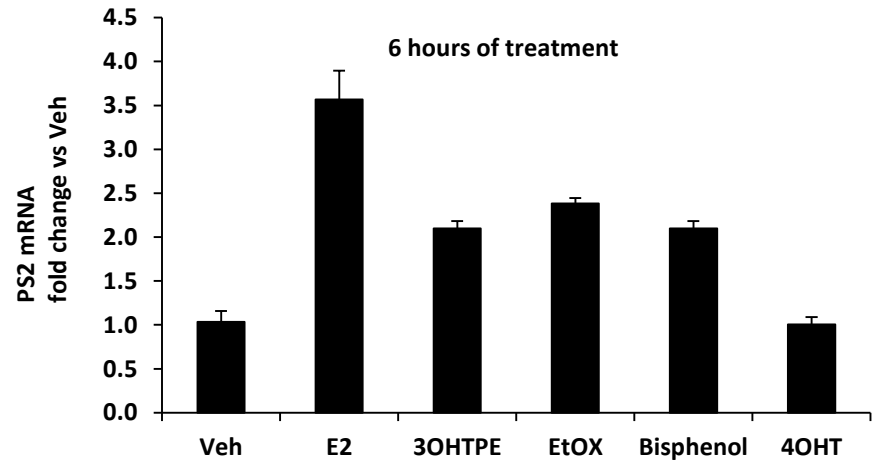

**Supplemental Figure 2. Regulation of PS2 (TFF1) gene by triphenylethylenes, E<sub>2</sub> and 4OHT in MCF7:WS8 and MCF7:5C cells.**

(A) MCF7:WS8 and (B) MCF7:5C cells were treated E<sub>2</sub> (1 nM), 3OHTPE (1 μM), EtOX (1 μM), bisphenol (1 μM) and 4OHT (1 μM) for 2 h or 6 h. Cells were harvested and RNA extracted. Expression level of PS2 (TFF1) was assessed using RT-PCR. Data is represented as fold difference versus vehicle (veh) treated cells. All data points are average of three replicates ± SD.

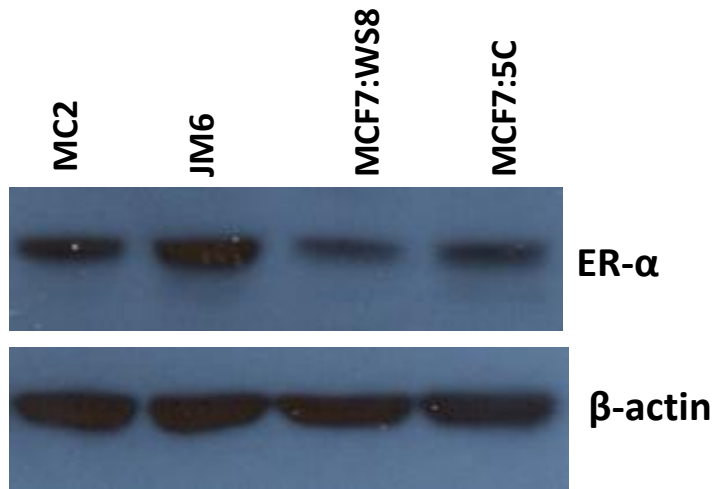

**Supplemental Figure 3. ER $\alpha$  expression levels in breast cancer cell lines used in the study.**

MC2, JM6, MCF7:WS8 and MCF7:5C cells were treated with control (0.1% ethanol) for 24h and lysates were prepared and analysed by immunoblotting for ER $\alpha$  protein levels.  $\beta$  actin was used as a loading control.

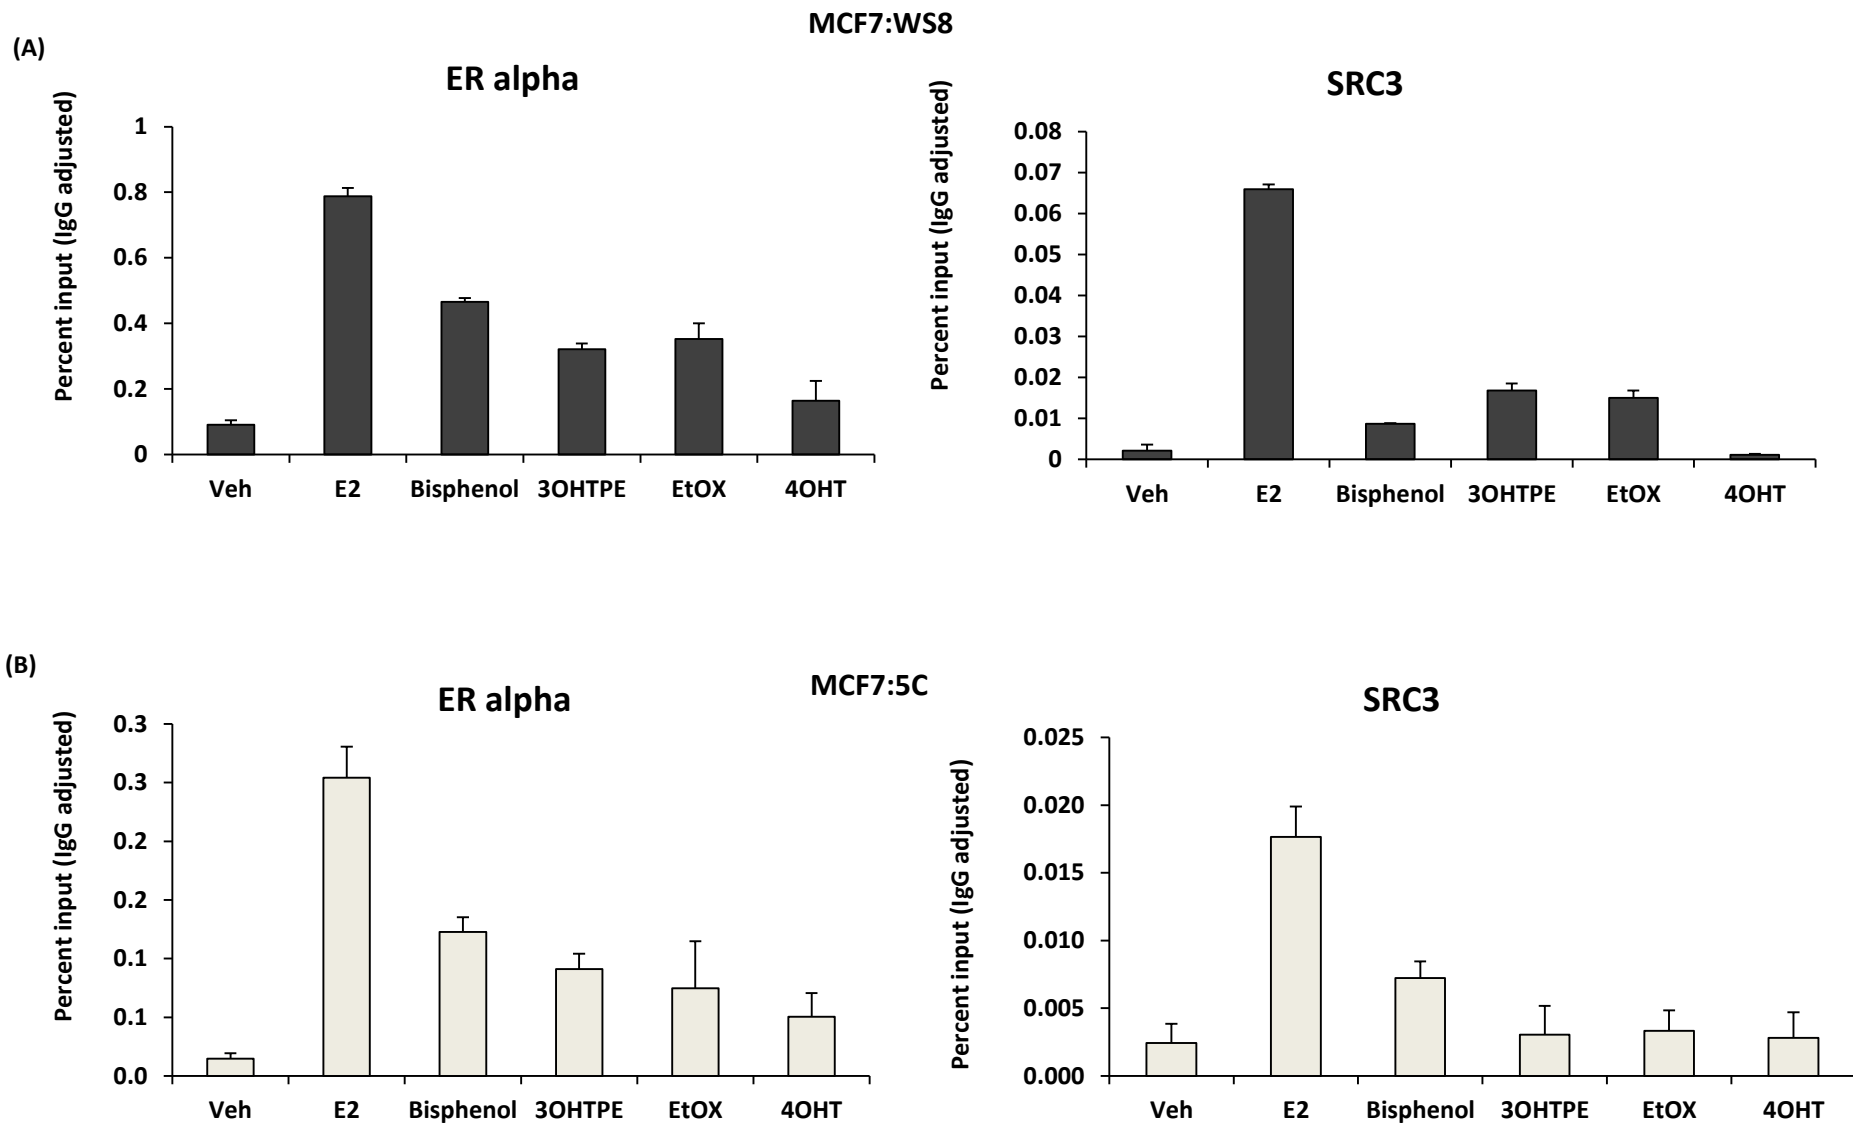

**Supplemental Figure 4. Recruitment of ER alpha and SRC3 (AIB1) at PS2 proximal promoter region containing ERE in MCF7:WS8 and MCF7:5C cells.** (A) MCF7:WS8 cells treated for 45 minutes with E<sub>2</sub> (1nM), 3OHTPE (1μM), EtOX (1μM), bisphenol (1μM) and 4OHT (1μM) and CHIP assay was performed as described in materials and methods. (B) MCF7:5C cells were treated identically as mentioned above and CHIP assay was performed under identical conditions. Data is represented as percent input of the starting chromatin used for the CHIP

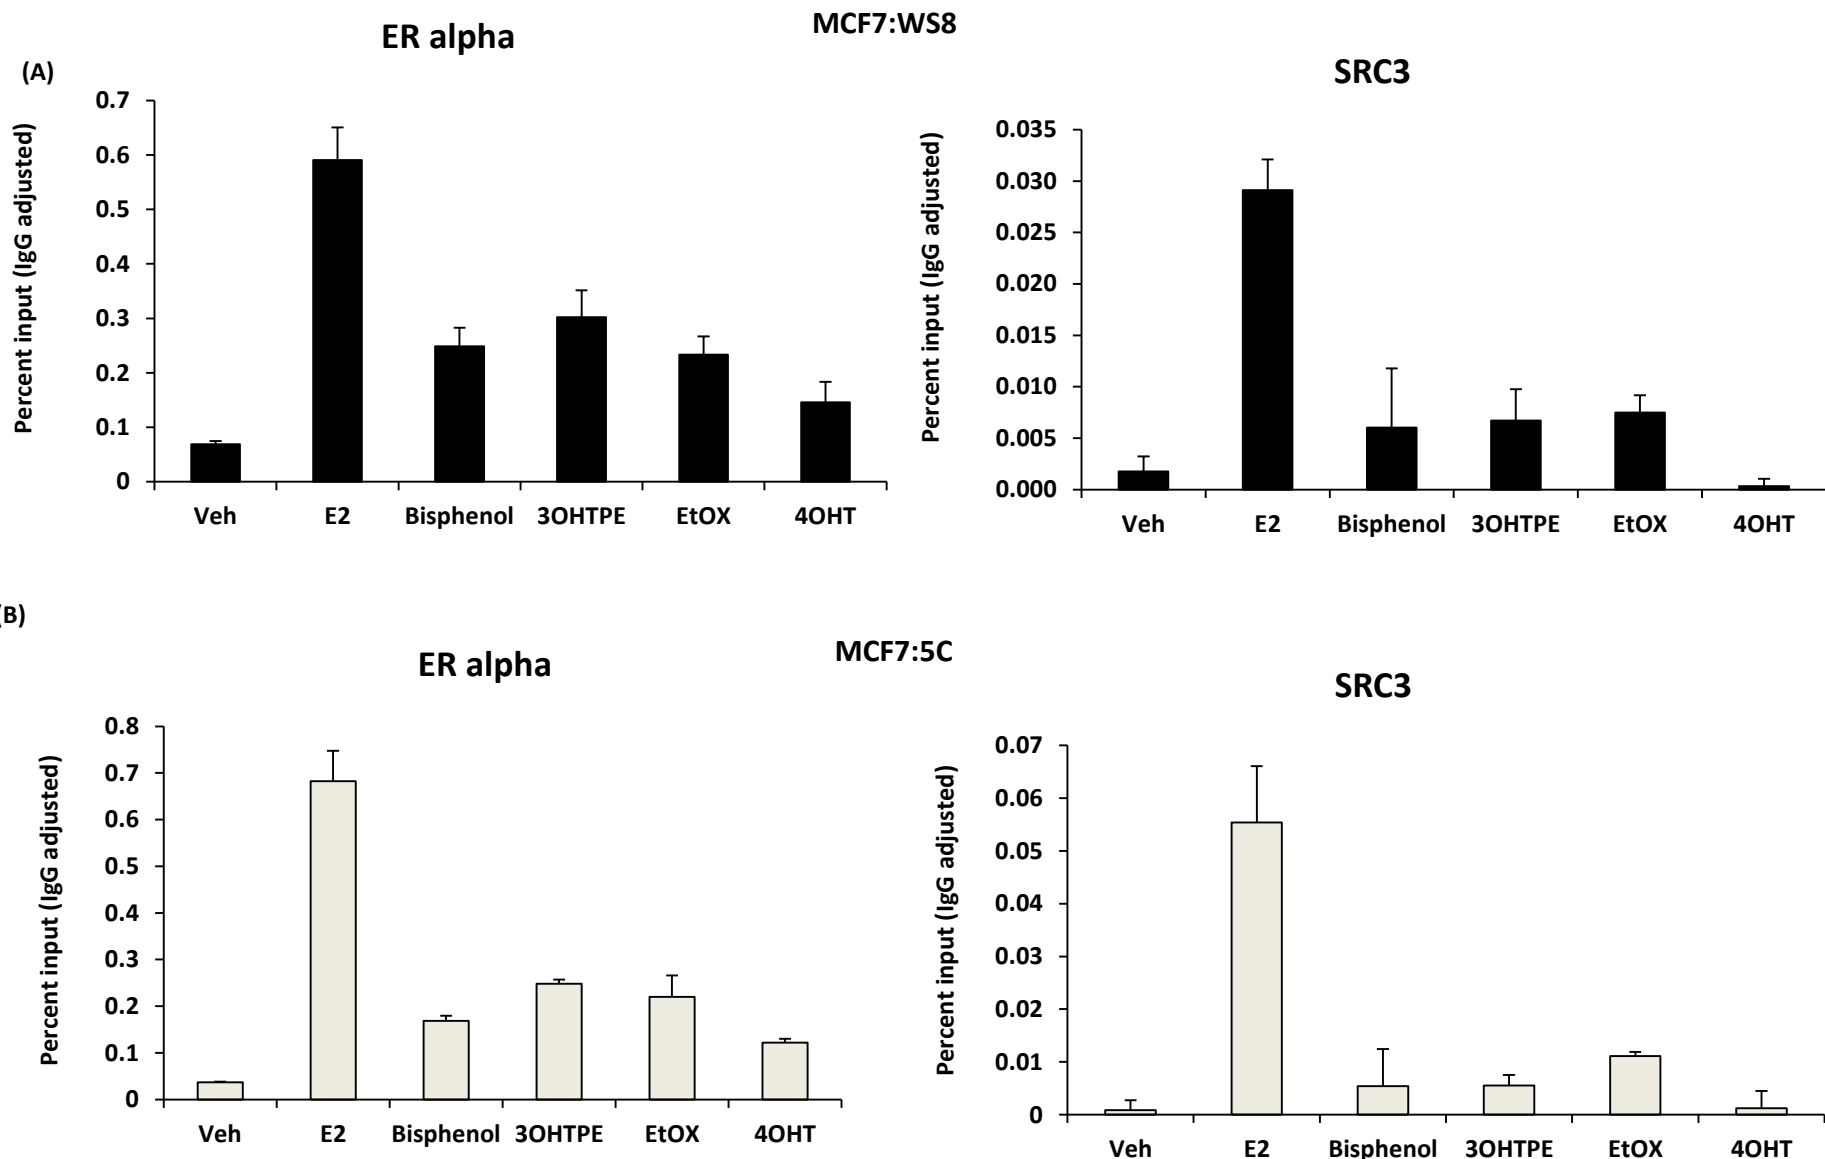

**Supplemental Figure 5. Recruitment of ER alpha and SRC3 (AIB1) at PS2 proximal promoter region containing ERE in MCF7:WS8 and MCF7:5C cells.** (A) MCF7:WS8 cells treated for 45 minutes with E<sub>2</sub> (1nM), 3OHTPE (1μM), EtOX (1μM), bisphenol (1μM) and 4OHT (1μM) and CHIP assay was performed as described in materials and methods. (B) MCF7:5C cells were treated identically as mentioned above and CHIP assay was performed under identical conditions. Data is represented as percent input of the starting chromatin used for the CHIP
